# Supplementary material for: Effects of origin, seasons and storage under different temperatures on germination of Senecio vulgaris (Asteraceae) seeds
Source: PeerJ. 2016 Aug 17;4:e2346. doi: 10.7717/peerj.2346 (PMC4991864; doi:10.7717/peerj.2346)
Supplement: Data S1 [file peerj-04-2346-s001.xlsx]

## Sheet: explanations
dataset: exp1-analysis
directly used for statistic analysis; data from the Senecio vulgaris seed germiantion experiment in a climate chamber
Sowing date: 23/12/2013
variable explainations
range	a factor with levels native,invasive, indicating seeds from a population in the native or invasive range
location	a factor with 12 levels indicating seeds from a population located in which city or town
population	12 discontinuous numbers labeling the 12 populations
pop1	12 continuous (1-12) numbers labeling the 12 populations
pop2	6 continuous (1-6) numbers labeling the 12 populations; 6 populations per range
family	3 numbers (1,2 and 3) labeling the 3 families from the same population
gp	Germination percentage of final germination percentage
	GP= (Sg/Spl)*100
	Sg: Seeds germinated
	Spl: Total planted seeds
mgt	Mean germination time
	MGT=Sum(nd)/SumN
	n: number of of newly germinated seeds after each incubation period in days d
	N: Total number of seeds germinated at the end of the test
loggp	log10(gp+1)
logmgt	log10(mgt+2)
dataset: exp2-analysis
directly used for statistic analysis; data from the Senecio vulgaris seed germiantion experiment under ambient conditions.
variable explainations
range	a factor with levels native,invasive, indicating seeds from a population in the native or invasive range
location	a factor with 12 levels indicating seeds from a population located in which city or town
population	12 discontinuous numbers labeling the 12 populations
pop1	12 continuous (1-12) numbers labeling the 12 populations
pop2	6 continuous (1-6) numbers labeling the 12 populations; 6 populations per range
family	3 numbers (1,2 and 3) labeling the 3 families from the same population
season	a factor with levels of summer and autaum, indicating when seeds were germinated
stcond	a factor with 2 levels : Room temp (about 27 ℃), and Low temp (4 ℃), indicating which temrature the seeds were stored.
gp	see explanatons above
mgt	see explanatons above
loggp	see explanatons above
logmgt	see explanatons above
dataset: fig.4
used for make figure 4
variable explainations	see above
dataset: fig.S1
monthly mean temprature used for make figure S1

## Sheet: exp1-anaysis
range	location	population	pop1	pop2	family	gp	mgt	loggp	logmgt
Native	Leiden	9	1	1	1	100	9.5	2.00432	1.02119
Native	Leiden	9	1	1	2	100	10.8	2.00432	1.07188
Native	Leiden	9	1	1	3	80	13.5	1.90849	1.16137
Native	Lisse	10	2	2	1	100	8.1	2.00432	0.959041
Native	Lisse	10	2	2	2	100	8.6	2.00432	0.982271
Native	Lisse	10	2	2	3	90	10.8889	1.95904	1.07514
Native	Oegstgeest	13	3	3	1	100	6.2	2.00432	0.857332
Native	Oegstgeest	13	3	3	2	100	9.6	2.00432	1.02531
Native	Oegstgeest	13	3	3	3	100	5.2	2.00432	0.792392
Native	Potsdam	14	4	4	1	90	11.8889	1.95904	1.11022
Native	Potsdam	14	4	4	2	80	10	1.90849	1.04139
Native	Potsdam	14	4	4	3	100	10	2.00432	1.04139
Native	St Andrews	18	5	5	1	70	10.8571	1.85126	1.07398
Native	St Andrews	18	5	5	2	100	7.2	2.00432	0.913814
Native	St Andrews	18	5	5	3	90	10.3333	1.95904	1.05436
Native	Teylingen	19	6	6	1	70	7.14286	1.85126	0.910777
Native	Teylingen	19	6	6	2	100	7.4	2.00432	0.924279
Native	Teylingen	19	6	6	3	70	13.2857	1.85126	1.1549
Invasive	Fuyuan	4	7	1	1	90	7.88889	1.95904	0.948847
Invasive	Fuyuan	4	7	1	2	100	12.1	2.00432	1.11727
Invasive	Fuyuan	4	7	1	3	100	10	2.00432	1.04139
Invasive	Hegang	5	8	2	1	100	8	2.00432	0.954243
Invasive	Hegang	5	8	2	2	100	9	2.00432	1
Invasive	Hegang	5	8	2	3	70	9	1.85126	1
Invasive	Luobei	11	9	3	1	100	8.5	2.00432	0.977724
Invasive	Luobei	11	9	3	2	80	8.375	1.90849	0.971971
Invasive	Luobei	11	9	3	3	60	10	1.78533	1.04139
Invasive	Siping	17	10	4	1	90	10.6667	1.95904	1.06695
Invasive	Siping	17	10	4	2	90	11	1.95904	1.07918
Invasive	Siping	17	10	4	3	100	8.2	2.00432	0.963788
Invasive	Tongjiang	20	11	5	1	90	13.6667	1.95904	1.16633
Invasive	Tongjiang	20	11	5	2	90	14	1.95904	1.17609
Invasive	Tongjiang	20	11	5	3	80	12.875	1.90849	1.14223
Invasive	Lijiang	22	12	6	1	100	6.7	2.00432	0.886491
Invasive	Lijiang	22	12	6	2	100	10.2	2.00432	1.04922
Invasive	Lijiang	22	12	6	3	100	7.9	2.00432	0.94939

## Sheet: exp2-anaysis
range	location	population	pop1	pop2	family	season	stcond	gp	mgt	loggp	logmgt
Invasive	Fuyuan	4	7	1	3	Summer	Room temp	50	11	1.70757	1.07918
Native	Barcelona	1	1	1	3	Summer	Low temp	30	7.33	1.49136	0.920645
Native	Oegstgeest	13	4	4	1	Summer	Room temp	20	11	1.32222	1.07918
Native	Puławy	15	5	5	1	Summer	Room temp	20	6	1.32222	0.845098
Invasive	Yichun	24	11	5	3	Summer	Room temp	20	10	1.32222	1.04139
Invasive	Lijiang	25	12	6	3	Summer	Room temp	20	7	1.32222	0.90309
Invasive	Fuyuan	4	7	1	1	Summer	Low temp	20	7	1.32222	0.90309
Invasive	Siping	17	9	3	2	Summer	Low temp	20	6	1.32222	0.845098
Native	Leiden	9	3	3	1	Summer	Room temp	10	6	1.04139	0.845098
Native	Oegstgeest	13	4	4	2	Summer	Room temp	10	0	1.04139	0
Invasive	Siping	17	9	3	2	Summer	Room temp	10	9	1.04139	1
Invasive	Yichun	24	11	5	1	Summer	Room temp	10	12	1.04139	1.11394
Invasive	Yichun	24	11	5	2	Summer	Room temp	10	6	1.04139	0.845098
Native	Fribourg	3	2	2	3	Summer	Low temp	10	9	1.04139	1
Native	Leiden	9	3	3	1	Summer	Low temp	10	9	1.04139	1
Native	Leiden	9	3	3	3	Summer	Low temp	10	6	1.04139	0.845098
Native	Puławy	15	5	5	2	Summer	Low temp	10	5	1.04139	0.778151
Invasive	Fuyuan	4	7	1	3	Summer	Low temp	10	11	1.04139	1.07918
Invasive	Hegan	5	8	2	2	Summer	Low temp	10	10	1.04139	1.04139
Invasive	Tongjiang	20	10	4	3	Summer	Low temp	10	10	1.04139	1.04139
Invasive	Lijiang	25	12	6	2	Summer	Low temp	10	19	1.04139	1.30103
Native	Barcelona	1	1	1	1	Summer	Room temp	0	0	0	0
Native	Barcelona	1	1	1	2	Summer	Room temp	0	0	0	0
Native	Barcelona	1	1	1	3	Summer	Room temp	0	0	0	0
Native	Fribourg	3	2	2	1	Summer	Room temp	0	0	0	0
Native	Fribourg	3	2	2	2	Summer	Room temp	0	0	0	0
Native	Fribourg	3	2	2	3	Summer	Room temp	0	0	0	0
Native	Leiden	9	3	3	2	Summer	Room temp	0	0	0	0
Native	Leiden	9	3	3	3	Summer	Room temp	0	0	0	0
Native	Oegstgeest	13	4	4	3	Summer	Room temp	0	14	0	1.17609
Native	Puławy	15	5	5	2	Summer	Room temp	0	0	0	0
Native	Puławy	15	5	5	3	Summer	Room temp	0	0	0	0
Native	St Andrew	18	6	6	1	Summer	Room temp	0	0	0	0
Native	St Andrew	18	6	6	2	Summer	Room temp	0	0	0	0
Native	St Andrew	18	6	6	3	Summer	Room temp	0	0	0	0
Invasive	Fuyuan	4	7	1	1	Summer	Room temp	0	0	0	0
Invasive	Fuyuan	4	7	1	2	Summer	Room temp	0	0	0	0
Invasive	Hegan	5	8	2	1	Summer	Room temp	0	0	0	0
Invasive	Hegan	5	8	2	2	Summer	Room temp	0	0	0	0
Invasive	Hegan	5	8	2	3	Summer	Room temp	0	0	0	0
Invasive	Siping	17	9	3	1	Summer	Room temp	0	0	0	0
Invasive	Siping	17	9	3	3	Summer	Room temp	0	0	0	0
Invasive	Tongjiang	20	10	4	1	Summer	Room temp	0	0	0	0
Invasive	Tongjiang	20	10	4	2	Summer	Room temp	0	0	0	0
Invasive	Tongjiang	20	10	4	3	Summer	Room temp	0	0	0	0
Invasive	Lijiang	25	12	6	1	Summer	Room temp	0	0	0	0
Invasive	Lijiang	25	12	6	2	Summer	Room temp	0	0	0	0
Native	Barcelona	1	1	1	1	Summer	Low temp	0	0	0	0
Native	Barcelona	1	1	1	2	Summer	Low temp	0	0	0	0
Native	Fribourg	3	2	2	1	Summer	Low temp	0	0	0	0
Native	Fribourg	3	2	2	2	Summer	Low temp	0	0	0	0
Native	Leiden	9	3	3	2	Summer	Low temp	0	0	0	0
Native	Oestgeest	13	4	4	1	Summer	Low temp	0	0	0	0
Native	Oestgeest	13	4	4	2	Summer	Low temp	0	0	0	0
Native	Oestgeest	13	4	4	3	Summer	Low temp	0	0	0	0
Native	Puławy	15	5	5	1	Summer	Low temp	0	0	0	0
Native	Puławy	15	5	5	3	Summer	Low temp	0	0	0	0
Native	St Andrew	18	6	6	1	Summer	Low temp	0	0	0	0
Native	St Andrew	18	6	6	2	Summer	Low temp	0	0	0	0
Native	St Andrew	18	6	6	3	Summer	Low temp	0	0	0	0
Invasive	Fuyuan	4	7	1	2	Summer	Low temp	0	0	0	0
Invasive	Hegan	5	8	2	1	Summer	Low temp	0	0	0	0
Invasive	Hegan	5	8	2	3	Summer	Low temp	0	0	0	0
Invasive	Siping	17	9	3	1	Summer	Low temp	0	0	0	0
Invasive	Siping	17	9	3	3	Summer	Low temp	0	0	0	0
Invasive	Tongjiang	20	10	4	1	Summer	Low temp	0	0	0	0
Invasive	Tongjiang	20	10	4	2	Summer	Low temp	0	0	0	0
Invasive	Yichun	24	11	5	1	Summer	Low temp	0	0	0	0
Invasive	Yichun	24	11	5	2	Summer	Low temp	0	0	0	0
Invasive	Yichun	24	11	5	3	Summer	Low temp	0	0	0	0
Invasive	Lijiang	25	12	6	1	Summer	Low temp	0	0	0	0
Invasive	Lijiang	25	12	6	3	Summer	Low temp	0	0	0	0
Invasive	Fuyuan	4	7	1	3	Autumn	Room temp	80	5.625	1.90849	0.821186
Invasive	Yichun	24	11	5	3	Autumn	Room temp	70	5.14286	1.85126	0.788371
Invasive	Fuyuan	4	7	1	2	Autumn	Room temp	50	5.6	1.70757	0.819544
Invasive	Hegan	5	8	2	2	Autumn	Room temp	50	6	1.70757	0.845098
Native	Leiden	9	3	3	3	Autumn	Room temp	40	4.25	1.61278	0.720159
Invasive	Fuyuan	4	7	1	1	Autumn	Room temp	40	5	1.61278	0.778151
Invasive	Hegan	5	8	2	1	Autumn	Room temp	40	8.75	1.61278	0.989005
Invasive	Siping	17	9	3	3	Autumn	Room temp	40	4	1.61278	0.69897
Invasive	Lijiang	25	12	6	2	Autumn	Room temp	40	4	1.61278	0.69897
Native	Leiden	9	3	3	2	Autumn	Room temp	30	13	1.49136	1.14613
Native	Oestgeest	13	4	4	1	Autumn	Room temp	30	6	1.49136	0.845098
Native	Oestgeest	13	4	4	2	Autumn	Room temp	30	4.33333	1.49136	0.726999
Invasive	Siping	17	9	3	1	Autumn	Room temp	30	6	1.49136	0.845098
Invasive	Tongjiang	20	10	4	2	Autumn	Room temp	30	4.3333	1.49136	0.726996
Native	Fribourg	3	2	2	2	Autumn	Room temp	20	4	1.32222	0.69897
Native	St Andrew	18	6	6	2	Autumn	Room temp	20	16	1.32222	1.23045
Native	St Andrew	18	6	6	3	Autumn	Room temp	20	9	1.32222	1
Invasive	Hegan	5	8	2	3	Autumn	Room temp	20	4	1.32222	0.69897
Invasive	Siping	17	9	3	2	Autumn	Room temp	20	4.5	1.32222	0.740363
Invasive	Yichun	24	11	5	2	Autumn	Room temp	20	6.5	1.32222	0.875061
Invasive	Lijiang	25	12	6	1	Autumn	Room temp	20	13	1.32222	1.14613
Invasive	Lijiang	25	12	6	3	Autumn	Room temp	20	5.66667	1.32222	0.823909
Native	Barcelona	1	1	1	2	Autumn	Room temp	10	5	1.04139	0.778151
Native	Fribourg	3	2	2	1	Autumn	Room temp	10	4	1.04139	0.69897
Native	Leiden	9	3	3	1	Autumn	Room temp	10	7	1.04139	0.90309
Native	Puławy	15	5	5	1	Autumn	Room temp	10	7	1.04139	0.90309
Native	St Andrew	18	6	6	1	Autumn	Room temp	10	10	1.04139	1.04139
Invasive	Yichun	24	11	5	1	Autumn	Room temp	10	5	1.04139	0.778151
Native	Barcelona	1	1	1	1	Autumn	Room temp	0	0	0	0
Native	Barcelona	1	1	1	3	Autumn	Room temp	0	0	0	0
Native	Fribourg	3	2	2	3	Autumn	Room temp	0	0	0	0
Native	Oestgeest	13	4	4	3	Autumn	Room temp	0	0	0	0
Native	Puławy	15	5	5	2	Autumn	Room temp	0	0	0	0
Native	Puławy	15	5	5	3	Autumn	Room temp	0	0	0	0
Invasive	Tongjiang	20	10	4	1	Autumn	Room temp	0	0	0	0
Invasive	Tongjiang	20	10	4	3	Autumn	Room temp	0	0	0	0
Native	Barcelona	1	1	1	1	Autumn	Low temp	0	0	0	0
Native	Barcelona	1	1	1	2	Autumn	Low temp	70	4.85714	1.85126	0.767686
Native	Barcelona	1	1	1	3	Autumn	Low temp	100	9.2	2.00432	1.0086
Native	Fribourg	3	2	2	1	Autumn	Low temp	40	5.5	1.61278	0.812913
Native	Fribourg	3	2	2	2	Autumn	Low temp	30	5.33333	1.49136	0.801632
Native	Fribourg	3	2	2	3	Autumn	Low temp	20	5	1.32222	0.778151
Native	Leiden	9	3	3	1	Autumn	Low temp	0	0	0	0
Native	Leiden	9	3	3	2	Autumn	Low temp	40	10	1.61278	1.04139
Native	Leiden	9	3	3	3	Autumn	Low temp	100	4.3	2.00432	0.724276
Native	Oestgeest	13	4	4	1	Autumn	Low temp	100	3.9	2.00432	0.690196
Native	Oestgeest	13	4	4	2	Autumn	Low temp	100	6.6	2.00432	0.880814
Native	Oestgeest	13	4	4	3	Autumn	Low temp	30	5.33333	1.49136	0.801632
Native	Puławy	15	5	5	1	Autumn	Low temp	10	4	1.04139	0.69897
Native	Puławy	15	5	5	2	Autumn	Low temp	0	0	0	0
Native	Puławy	15	5	5	3	Autumn	Low temp	20	3	1.32222	0.60206
Native	St Andrew	18	6	6	1	Autumn	Low temp	70	5.71429	1.85126	0.827
Native	St Andrew	18	6	6	2	Autumn	Low temp	50	6	1.70757	0.845098
Native	St Andrew	18	6	6	3	Autumn	Low temp	10	4	1.04139	0.69897
Invasive	Fuyuan	4	7	1	1	Autumn	Low temp	100	5.1	2.00432	0.78533
Invasive	Fuyuan	4	7	1	2	Autumn	Low temp	40	4.25	1.61278	0.720159
Invasive	Fuyuan	4	7	1	3	Autumn	Low temp	60	6.66667	1.78533	0.884607
Invasive	Hegan	5	8	2	1	Autumn	Low temp	100	4.3	2.00432	0.724276
Invasive	Hegan	5	8	2	2	Autumn	Low temp	90	8.44444	1.95904	0.975176
Invasive	Hegan	5	8	2	3	Autumn	Low temp	70	8.57143	1.85126	0.980977
Invasive	Siping	17	9	3	1	Autumn	Low temp	70	4.14286	1.85126	0.711204
Invasive	Siping	17	9	3	2	Autumn	Low temp	70	5.85714	1.85126	0.836143
Invasive	Siping	17	9	3	3	Autumn	Low temp	60	4.83333	1.78533	0.765917
Invasive	Tongjiang	20	10	4	1	Autumn	Low temp	80	10.875	1.90849	1.07463
Invasive	Tongjiang	20	10	4	2	Autumn	Low temp	50	4.8	1.70757	0.763428
Invasive	Tongjiang	20	10	4	3	Autumn	Low temp	40	4.25	1.61278	0.720159
Invasive	Yichun	24	11	5	1	Autumn	Low temp	50	4.8	1.70757	0.763428
Invasive	Yichun	24	11	5	2	Autumn	Low temp	40	3	1.61278	0.60206
Invasive	Yichun	24	11	5	3	Autumn	Low temp	40	4.5	1.61278	0.740363
Invasive	Lijiang	25	12	6	1	Autumn	Low temp	60	5.5	1.78533	0.812913
Invasive	Lijiang	25	12	6	2	Autumn	Low temp	90	4.33	1.95904	0.726727
Invasive	Lijiang	25	12	6	3	Autumn	Low temp	50	5.4	1.70757	0.80618

## Sheet: fig.4
range	population	pop1	pop2	family	location	season	stcond	group1	group2	group3	gp	mgt
Native	1	1	1	1	Barcelona	Summer	Room temp	s-rt	na-rt	na-s	0	0
Native	1	1	1	2	Barcelona	Summer	Room temp	s-rt	na-rt	na-s	0	0
Native	1	1	1	3	Barcelona	Summer	Room temp	s-rt	na-rt	na-s	0	0
Native	3	2	2	1	Fribourg	Summer	Room temp	s-rt	na-rt	na-s	0	0
Native	3	2	2	2	Fribourg	Summer	Room temp	s-rt	na-rt	na-s	0	0
Native	3	2	2	3	Fribourg	Summer	Room temp	s-rt	na-rt	na-s	0	0
Native	9	3	3	1	Leiden	Summer	Room temp	s-rt	na-rt	na-s	10	6
Native	9	3	3	2	Leiden	Summer	Room temp	s-rt	na-rt	na-s	0	0
Native	9	3	3	3	Leiden	Summer	Room temp	s-rt	na-rt	na-s	0	0
Native	13	4	4	1	Oegstgeest	Summer	Room temp	s-rt	na-rt	na-s	20	11
Native	13	4	4	2	Oegstgeest	Summer	Room temp	s-rt	na-rt	na-s	10	0
Native	13	4	4	3	Oegstgeest	Summer	Room temp	s-rt	na-rt	na-s	0	14
Native	15	5	5	1	Pu?awy	Summer	Room temp	s-rt	na-rt	na-s	20	6
Native	15	5	5	2	Pu?awy	Summer	Room temp	s-rt	na-rt	na-s	0	0
Native	15	5	5	3	Pu?awy	Summer	Room temp	s-rt	na-rt	na-s	0	0
Native	18	6	6	1	St Andrew	Summer	Room temp	s-rt	na-rt	na-s	0	0
Native	18	6	6	2	St Andrew	Summer	Room temp	s-rt	na-rt	na-s	0	0
Native	18	6	6	3	St Andrew	Summer	Room temp	s-rt	na-rt	na-s	0	0
Invasive	4	7	1	1	Fuyuan	Summer	Room temp	s-rt	in-rt	in-s	0	0
Invasive	4	7	1	2	Fuyuan	Summer	Room temp	s-rt	in-rt	in-s	0	0
Invasive	4	7	1	3	Fuyuan	Summer	Room temp	s-rt	in-rt	in-s	50	11
Invasive	5	8	2	1	Hegan	Summer	Room temp	s-rt	in-rt	in-s	0	0
Invasive	5	8	2	2	Hegan	Summer	Room temp	s-rt	in-rt	in-s	0	0
Invasive	5	8	2	3	Hegan	Summer	Room temp	s-rt	in-rt	in-s	0	0
Invasive	17	9	3	1	Siping	Summer	Room temp	s-rt	in-rt	in-s	0	0
Invasive	17	9	3	2	Siping	Summer	Room temp	s-rt	in-rt	in-s	10	9
Invasive	17	9	3	3	Siping	Summer	Room temp	s-rt	in-rt	in-s	0	0
Invasive	20	10	4	1	Tongjiang	Summer	Room temp	s-rt	in-rt	in-s	0	0
Invasive	20	10	4	2	Tongjiang	Summer	Room temp	s-rt	in-rt	in-s	0	0
Invasive	20	10	4	3	Tongjiang	Summer	Room temp	s-rt	in-rt	in-s	0	0
Invasive	24	11	5	1	Yichun	Summer	Room temp	s-rt	in-rt	in-s	10	12
Invasive	24	11	5	2	Yichun	Summer	Room temp	s-rt	in-rt	in-s	10	6
Invasive	24	11	5	3	Yichun	Summer	Room temp	s-rt	in-rt	in-s	20	10
Invasive	25	12	6	1	Lijiang	Summer	Room temp	s-rt	in-rt	in-s	0	0
Invasive	25	12	6	2	Lijiang	Summer	Room temp	s-rt	in-rt	in-s	0	0
Invasive	25	12	6	3	Lijiang	Summer	Room temp	s-rt	in-rt	in-s	20	7
Native	1	1	1	1	Barcelona	Summer	Low temp	s-lt	na-lt	na-s	0	0
Native	1	1	1	2	Barcelona	Summer	Low temp	s-lt	na-lt	na-s	0	0
Native	1	1	1	3	Barcelona	Summer	Low temp	s-lt	na-lt	na-s	30	7.33
Native	3	2	2	1	Fribourg	Summer	Low temp	s-lt	na-lt	na-s	0	0
Native	3	2	2	2	Fribourg	Summer	Low temp	s-lt	na-lt	na-s	0	0
Native	3	2	2	3	Fribourg	Summer	Low temp	s-lt	na-lt	na-s	10	9
Native	9	3	3	1	Leiden	Summer	Low temp	s-lt	na-lt	na-s	10	9
Native	9	3	3	2	Leiden	Summer	Low temp	s-lt	na-lt	na-s	0	0
Native	9	3	3	3	Leiden	Summer	Low temp	s-lt	na-lt	na-s	10	6
Native	13	4	4	1	Oegstgeest	Summer	Low temp	s-lt	na-lt	na-s	0	0
Native	13	4	4	2	Oegstgeest	Summer	Low temp	s-lt	na-lt	na-s	0	0
Native	13	4	4	3	Oegstgeest	Summer	Low temp	s-lt	na-lt	na-s	0	0
Native	15	5	5	1	Pu?awy	Summer	Low temp	s-lt	na-lt	na-s	0	0
Native	15	5	5	2	Pu?awy	Summer	Low temp	s-lt	na-lt	na-s	10	5
Native	15	5	5	3	Pu?awy	Summer	Low temp	s-lt	na-lt	na-s	0	0
Native	18	6	6	1	St Andrew	Summer	Low temp	s-lt	na-lt	na-s	0	0
Native	18	6	6	2	St Andrew	Summer	Low temp	s-lt	na-lt	na-s	0	0
Native	18	6	6	3	St Andrew	Summer	Low temp	s-lt	na-lt	na-s	0	0
Invasive	4	7	1	1	Fuyuan	Summer	Low temp	s-lt	in-lt	in-s	20	7
Invasive	4	7	1	2	Fuyuan	Summer	Low temp	s-lt	in-lt	in-s	0	0
Invasive	4	7	1	3	Fuyuan	Summer	Low temp	s-lt	in-lt	in-s	10	11
Invasive	5	8	2	1	Hegan	Summer	Low temp	s-lt	in-lt	in-s	0	0
Invasive	5	8	2	2	Hegan	Summer	Low temp	s-lt	in-lt	in-s	10	10
Invasive	5	8	2	3	Hegan	Summer	Low temp	s-lt	in-lt	in-s	0	0
Invasive	17	9	3	1	Siping	Summer	Low temp	s-lt	in-lt	in-s	0	0
Invasive	17	9	3	2	Siping	Summer	Low temp	s-lt	in-lt	in-s	20	6
Invasive	17	9	3	3	Siping	Summer	Low temp	s-lt	in-lt	in-s	0	0
Invasive	20	10	4	1	Tongjiang	Summer	Low temp	s-lt	in-lt	in-s	0	0
Invasive	20	10	4	2	Tongjiang	Summer	Low temp	s-lt	in-lt	in-s	0	0
Invasive	20	10	4	3	Tongjiang	Summer	Low temp	s-lt	in-lt	in-s	10	10
Invasive	24	11	5	1	Yichun	Summer	Low temp	s-lt	in-lt	in-s	0	0
Invasive	24	11	5	2	Yichun	Summer	Low temp	s-lt	in-lt	in-s	0	0
Invasive	24	11	5	3	Yichun	Summer	Low temp	s-lt	in-lt	in-s	0	0
Invasive	25	12	6	1	Lijiang	Summer	Low temp	s-lt	in-lt	in-s	0	0
Invasive	25	12	6	2	Lijiang	Summer	Low temp	s-lt	in-lt	in-s	10	19
Invasive	25	12	6	3	Lijiang	Summer	Low temp	s-lt	in-lt	in-s	0	0
Invasive	4	7	1	3	Fuyuan	Autumn	Room temp	a-rt	in-rt	in-a	80	5.63
Invasive	24	11	5	3	Yichun	Autumn	Room temp	a-rt	in-rt	in-a	70	5.14
Invasive	4	7	1	2	Fuyuan	Autumn	Room temp	a-rt	in-rt	in-a	50	5.6
Invasive	5	8	2	2	Hegan	Autumn	Room temp	a-rt	in-rt	in-a	50	6
Native	9	3	3	3	Leiden	Autumn	Room temp	a-rt	na-rt	na-a	40	4.25
Invasive	4	7	1	1	Fuyuan	Autumn	Room temp	a-rt	in-rt	in-a	40	5
Invasive	5	8	2	1	Hegan	Autumn	Room temp	a-rt	in-rt	in-a	40	8.75
Invasive	17	9	3	3	Siping	Autumn	Room temp	a-rt	in-rt	in-a	40	4
Invasive	25	12	6	2	Lijiang	Autumn	Room temp	a-rt	in-rt	in-a	40	4
Native	9	3	3	2	Leiden	Autumn	Room temp	a-rt	na-rt	na-a	30	13
Native	13	4	4	1	Oegstgeest	Autumn	Room temp	a-rt	na-rt	na-a	30	6
Native	13	4	4	2	Oegstgeest	Autumn	Room temp	a-rt	na-rt	na-a	30	4.33
Invasive	17	9	3	1	Siping	Autumn	Room temp	a-rt	in-rt	in-a	30	6
Invasive	20	10	4	2	Tongjiang	Autumn	Room temp	a-rt	in-rt	in-a	30	4.3333
Native	3	2	2	2	Fribourg	Autumn	Room temp	a-rt	na-rt	na-a	20	4
Native	18	6	6	2	St Andrew	Autumn	Room temp	a-rt	na-rt	na-a	20	16
Native	18	6	6	3	St Andrew	Autumn	Room temp	a-rt	na-rt	na-a	20	9
Invasive	5	8	2	3	Hegan	Autumn	Room temp	a-rt	in-rt	in-a	20	4
Invasive	17	9	3	2	Siping	Autumn	Room temp	a-rt	in-rt	in-a	20	4.5
Invasive	24	11	5	2	Yichun	Autumn	Room temp	a-rt	in-rt	in-a	20	6.5
Invasive	25	12	6	1	Lijiang	Autumn	Room temp	a-rt	in-rt	in-a	20	13
Invasive	25	12	6	3	Lijiang	Autumn	Room temp	a-rt	in-rt	in-a	20	5.67
Native	1	1	1	2	Barcelona	Autumn	Room temp	a-rt	na-rt	na-a	10	5
Native	3	2	2	1	Fribourg	Autumn	Room temp	a-rt	na-rt	na-a	10	4
Native	9	3	3	1	Leiden	Autumn	Room temp	a-rt	na-rt	na-a	10	7
Native	15	5	5	1	Pu?awy	Autumn	Room temp	a-rt	na-rt	na-a	10	7
Native	18	6	6	1	St Andrew	Autumn	Room temp	a-rt	na-rt	na-a	10	10
Invasive	24	11	5	1	Yichun	Autumn	Room temp	a-rt	in-rt	in-a	10	5
Native	1	1	1	1	Barcelona	Autumn	Room temp	a-rt	na-rt	na-a	0	0
Native	1	1	1	3	Barcelona	Autumn	Room temp	a-rt	na-rt	na-a	0	0
Native	3	2	2	3	Fribourg	Autumn	Room temp	a-rt	na-rt	na-a	0	0
Native	13	4	4	3	Oegstgeest	Autumn	Room temp	a-rt	na-rt	na-a	0	0
Native	15	5	5	2	Pu?awy	Autumn	Room temp	a-rt	na-rt	na-a	0	0
Native	15	5	5	3	Pu?awy	Autumn	Room temp	a-rt	na-rt	na-a	0	0
Invasive	20	10	4	1	Tongjiang	Autumn	Room temp	a-rt	in-rt	in-a	0	0
Invasive	20	10	4	3	Tongjiang	Autumn	Room temp	a-rt	in-rt	in-a	0	0
Native	1	1	1	1	Barcelona	Autumn	Low temp	a-lt	na-lt	na-a	0	0
Native	1	1	1	2	Barcelona	Autumn	Low temp	a-lt	na-lt	na-a	70	4.86
Native	1	1	1	3	Barcelona	Autumn	Low temp	a-lt	na-lt	na-a	100	9.2
Native	3	2	2	1	Fribourg	Autumn	Low temp	a-lt	na-lt	na-a	40	5.5
Native	3	2	2	2	Fribourg	Autumn	Low temp	a-lt	na-lt	na-a	30	5.33
Native	3	2	2	3	Fribourg	Autumn	Low temp	a-lt	na-lt	na-a	20	5
Native	9	3	3	1	Leiden	Autumn	Low temp	a-lt	na-lt	na-a	0	0
Native	9	3	3	2	Leiden	Autumn	Low temp	a-lt	na-lt	na-a	40	10
Native	9	3	3	3	Leiden	Autumn	Low temp	a-lt	na-lt	na-a	100	4.3
Native	13	4	4	1	Oegstgeest	Autumn	Low temp	a-lt	na-lt	na-a	100	3.9
Native	13	4	4	2	Oegstgeest	Autumn	Low temp	a-lt	na-lt	na-a	100	6.6
Native	13	4	4	3	Oegstgeest	Autumn	Low temp	a-lt	na-lt	na-a	30	5.33
Native	15	5	5	1	Pu?awy	Autumn	Low temp	a-lt	na-lt	na-a	10	4
Native	15	5	5	2	Pu?awy	Autumn	Low temp	a-lt	na-lt	na-a	0	0
Native	15	5	5	3	Pu?awy	Autumn	Low temp	a-lt	na-lt	na-a	20	3
Native	18	6	6	1	St Andrew	Autumn	Low temp	a-lt	na-lt	na-a	70	5.71
Native	18	6	6	2	St Andrew	Autumn	Low temp	a-lt	na-lt	na-a	50	6
Native	18	6	6	3	St Andrew	Autumn	Low temp	a-lt	na-lt	na-a	10	4
Invasive	4	7	1	1	Fuyuan	Autumn	Low temp	a-lt	in-lt	in-a	100	5.1
Invasive	4	7	1	2	Fuyuan	Autumn	Low temp	a-lt	in-lt	in-a	40	4.25
Invasive	4	7	1	3	Fuyuan	Autumn	Low temp	a-lt	in-lt	in-a	60	6.67
Invasive	5	8	2	1	Hegan	Autumn	Low temp	a-lt	in-lt	in-a	100	4.3
Invasive	5	8	2	2	Hegan	Autumn	Low temp	a-lt	in-lt	in-a	90	8.44
Invasive	5	8	2	3	Hegan	Autumn	Low temp	a-lt	in-lt	in-a	70	8.57
Invasive	17	9	3	1	Siping	Autumn	Low temp	a-lt	in-lt	in-a	70	4.14
Invasive	17	9	3	2	Siping	Autumn	Low temp	a-lt	in-lt	in-a	70	5.86
Invasive	17	9	3	3	Siping	Autumn	Low temp	a-lt	in-lt	in-a	60	4.83
Invasive	20	10	4	1	Tongjiang	Autumn	Low temp	a-lt	in-lt	in-a	80	10.88
Invasive	20	10	4	2	Tongjiang	Autumn	Low temp	a-lt	in-lt	in-a	50	4.8
Invasive	20	10	4	3	Tongjiang	Autumn	Low temp	a-lt	in-lt	in-a	40	4.25
Invasive	24	11	5	1	Yichun	Autumn	Low temp	a-lt	in-lt	in-a	50	4.8
Invasive	24	11	5	2	Yichun	Autumn	Low temp	a-lt	in-lt	in-a	40	3
Invasive	24	11	5	3	Yichun	Autumn	Low temp	a-lt	in-lt	in-a	40	4.5
Invasive	25	12	6	1	Lijiang	Autumn	Low temp	a-lt	in-lt	in-a	60	2.33
Invasive	25	12	6	2	Lijiang	Autumn	Low temp	a-lt	in-lt	in-a	90	5.5
Invasive	25	12	6	3	Lijiang	Autumn	Low temp	a-lt	in-lt	in-a	50	5.4

## Sheet: fig.s1
Month	Max	Mean	Min
January	8	4.2	0.4
February	10.1	6.3	2.4
March	14.4	10.5	6.6
April	21.4	17.2	12.9
May	26.4	22.3	18.2
June	29.7	26	22.3
July	32.6	29	25.4															Max monthly temperature
August	32.5	28.7	24.9															Mean Max monthly temperature
September	27.9	23.9	19.9															Min Max monthly temperature
October	22.7	18.3	13.9
November	16.5	12.1	7.6
December	10.8	6.6	2.3
Month	January	February	March	April	May	June	July	August	September	October	November	December	.
Max	8	10.1	14.4	21.4	26.4	29.7	32.6	32.5	27.9	22.7	16.5	10.8
Mean	4.2	6.3	10.5	17.2	22.3	26	29	28.7	23.9	18.3	12.1	6.6
Min	0.4	2.4	6.6	12.9	18.2	22.3	25.4	24.9	19.9	13.9	7.6	2.3
